# Supplementary material
Source: publisher site journal article supplement (https://www.degruyter.com/publication/journal_key/DEMA/downloadAsset/DEMA_Article%20Processing%20Charges.pdf)
Supplement: Supplementary file 1 [file DEMA_Article%20Processing%20Charges.pdf]

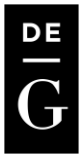

# DEMONSTRATIO MATHEMATICA

EFFECTIVE MARCH 2021

---

## ARTICLE PROCESSING CHARGES

In order to sustain the production of our fully-refereed open access journal, each article accepted for publication in [Demonstratio Mathematica](#) is subject to an Article Processing Charge of €1000. This fee is used to cover the costs of manuscript processing, professional typesetting and copyediting, as well as online hosting, long-term preservation, content aggregators worldwide, and extensive promotion to potential readers.

%%%%%%%%%

### APPLY FOR A DISCOUNT :

Authors who have limited access to funding for publications may apply for a discount (50% 60% 70% or even 80%).

*Inquiries concerning Article Processing Charges should be addressed **before or immediately after submission of a paper** to the Editorial Office ([demonstratio.editorial@degruyter.com](mailto:demonstratio.editorial@degruyter.com)).*

%%%%%%%%%

Editors and reviewers are not involved in author payment process and do not discuss charges with authors. The ability to pay does not influence whether or not a manuscript is accepted for publication.

There are no submission charges – Article Processing Charges apply after the acceptance of a manuscript. Information regarding payment of these charges will be provided following acceptance for publication.

## WAIVER POLICIES

If the submitting author is affiliated with an organization which is listed as an [Institutional Member](#), this membership offers a discount on the Article Processing Charge and the author has a reduced expense. Moreover, the authors who work for institutions in developing countries (countries classified by the World Bank as [low-income](#) and [lower-middle-income](#) economies) may apply for a waiver. Other authors who do not fulfill these criteria can also request a waiver or a discount during the submission process.

## FUNDING OPPORTUNITIES

Authors who are looking for funds to support the payment of Article Processing Charges have a number of options to consider. For details visit our [website](#).

## EDITORIAL OFFICE

Managing Editor  
Dr. Justyna Żuk

De Gruyter Poland Ltd.  
Bogumiła Zuga 32A  
01-811 Warsaw / Poland  
Tel: +48 22 701 50 15

Email: [Justyna.Zuk@degruyter.com](mailto:Justyna.Zuk@degruyter.com)  
[www.degruyter.com/view/j/dema](http://www.degruyter.com/view/j/dema)
